# Supplementary material for: Intensive Wildfire Associated With Volcanism Promoted the Vegetation Changeover in Southwest China During the Permian−Triassic Transition
Source: Frontiers journal article supplement (doi:10.3389/feart.2021.615841), 2021-03-04
Supplement: Table_1.XLSX [file Table_1.XLSX]

## Sheet: Sheet1
Sample	δ13Corg	Sample	δ13Corg (‰)	Sample	δ13Corg	Sample	δ13Corg (‰)
(m)	(‰)	(m)		(m)	(‰)	(m)
41.5	-25.471	0.2	-28.177	-6.77	-23.32	-16.81	-23.298
33.1	-26.503	-0.15(coal)	-28.344	-7.53	-22.814	-17.8(coal)	-23.497
29	-24.598	-0.35(coal)	-24.26	-8.44	-23.743	-17.8(charcoal)	-23.43
27.67	-27.973	-0.35(charcoal)	-24.01	-9.43	-23.041	-17.57	-23.579
24.68	-26.863	-1.06	-24.588	-9.81	-22.946	-20(coal)	-23.219
22.02	-28.291	-1.34	-23.501	-10.49	-23.188	-20(charcoal)	-23.037
20.13	-29.355	-2.09	-23.627	-11.33	-23.055	-23.6(coal)	-23.232
18.19	-27.987	-2.62	-23.451	-11.71	-22.733	-23.6(charcoal)	-22.375
16.8	-28.111	-2.81	-23.848	-11.7(charcoal)	-25.451	-28.2(coal)	-23.365
14.5	-28.926	-2.95(charcoal)	-24.481	-12.17	-22.535	-28.2(charcoal)	-23.166
12.6	-28.171	-3.12	-22.956	-12.55	-22.608	-29.4(coal)	-23.349
11.5	-29.568	-4.26	-23.185	-12.93	-22.795	-29.4(charcoal)	-32.498
11.5(charcoal)	-30.237	-4.26(charcoal)	-22.605	-13.23	-22.499	-36.4(coal)	-23.257
10.7	-30.237	-5.36	-23.264	-13.69	-24.182	-36.4(charcoal)	-23.124
8	-28.041	-5.36(charcoal)	-23.92	-14.07	-23.306	-56.8	-22.526
6.2	-27.143	-5.7	-22.556	-14.6	-22.432	-60.4	-22.503
5	-26.709	-5.7(charcoal)	-24.464	-15.8(coal)	-23.596	-66(coal)	-23.429
2.8	-27.341	-6.2	-22.949	-15.8(charcoal)	-24.393	-66(charcoal)	-22.406
1.6	-27.448	-6.46	-23.083	-16.05	-24.701
1.4	-28.031	-6.46(charcoal)	-21.792	-16.05(charcoal)	-22.881
