# Supplementary material for: Intensive Wildfire Associated With Volcanism Promoted the Vegetation Changeover in Southwest China During the Permian−Triassic Transition
Source: Frontiers journal article supplement (doi:10.3389/feart.2021.615841), 2021-03-04
Supplement: Table_2.XLSX [file Table_2.XLSX]

## Sheet: Sheet1
Horizons(m)	Random reflectance (％)								Romean	Romax
-0.35	2.394	2.278	2.429	1.913	1.625	2.431	3.579		2.379	3.579
8.8	1.044	1.297	1.02	1.56	2.67	2.11	1.128	1.242	1.509	2.67
